# Supplementary material for: Rapid, Selection-Free, High-Efficiency Genome Editing in Protozoan Parasites Using CRISPR-Cas9 Ribonucleoproteins
Source: PubMed Central journal article supplement (PMC5676044; doi:10.1128/mbio.01788-17), 2017-11-07
Supplement: mbo005173566st1.pdf [file mbo005173566st1.pdf]

| gRNA name  | target gene    | GenomeDB ID                          | gRNA sequence                 | position in gene of target seq. | Cas9 used | repair template                                                                           | use notes                  |
|------------|----------------|--------------------------------------|-------------------------------|---------------------------------|-----------|-------------------------------------------------------------------------------------------|----------------------------|
| eGFP-9     | eGFP           |                                      | GCAAGGGCGAGAGCTGTTAC/CGGGGT   | 9                               | SaCas9    | n/a                                                                                       | knockout eGFP              |
| eGFP-99    | eGFP           |                                      | GTAAGTTCGGCTCAGCTCGAC/CAGGAT  | 69                              | SaCas9    | n/a                                                                                       | knockout eGFP              |
| eGFP-156   | eGFP           |                                      | GCCGGTGGTCAGATGAACTT/CAGGGT   | 156                             | SaCas9    | GATGCCACTACGGCAGCTGACCCCTGAAGTAGATAGATAGTTCATCTGCACCACCGCAAGCTGCCCGTG                     | knockout eGFP              |
| tdTomato-5 | tdTomato       |                                      | GCAAGGGCGAGAGCTGTTAC/AGGAGT   | 5                               | SaCas9    | n/a                                                                                       | knockout tdTomato          |
| eGFP-153   | eGFP           |                                      | GGTGGTCAGATGAATCTCA/GGG       | 153                             | SpCas9    | n/a                                                                                       | knockout eGFP using SpCas9 |
| mCherry-20 | mCherry        |                                      | GAGGATAAATGGCCATCATCA/AGGAGT  | 20                              | SaCas9    | n/a                                                                                       | knockout mCherry           |
| Faz1-3139  | Faz1           | TcCLB.509631.140                     | GAGCTTGAGCAGAGAGCCAGCG/GAGGAT | 3139                            | SaCas9    | AGGCTGGCCGATGAGCTTGAACGAAAGCCATAGATAGATACGGCCGAAATGAGAGGCTGGCCGATGAGCTT                   | knockout Faz1              |
| KMP-13-36  | KMP-11         | TcCLB.510755.89                      | GAGCTTGGGGAGATTCTCT/AAAGAT    | 36                              | SaCas9    | TCTAAGTGAAAATGGCCACCTCTTGAGTAGATAGATAGGATTCGGCAAGCTTGACCCCTGGAT                           | knockout KMP-11            |
| TcGalF-162 | GalF, putative | TcCLB.511353.30 and TcCLB.511301.50  | GCCAGGAACTCTAATACAAA/ATGAAT   | 162                             | SaCas9    | GCCAGCAGCCCTCATTTGATCAATTTTAGATAGATAGTGTAAAACGACGGCCAGTGTAAAGCAGCTCTGGCCCTGTTTTTTG        | knockout GalF              |
| NTR-568    | nitroreductase | TcCLB.510611.60 and TcCLB.506791.70  | GCAGATAGCGCTGCCATAA/ATGAAT    | 568                             | SaCas9    | CTGGAGATGGGTACTACCACTCAATTTTAGATAGATAGTGTAAAACGACGGCCAGTGGCCAGCTCTCTGGCAGATCGTACTAC       | knockout NTR               |
| NTR-348    | nitroreductase | TcCLB.510611.60 and TcCLB.506791.70  | GTACCGCCTGAATACAGCC/GTGGGT    | 348                             | SaCas9    | GTACGGGCTCCTACCGCCTGAATACAGTAGATAGATAGTGTAAAACGACGGCCAGTCCGTTGGTGGCTGTTGTCATACAGAGGAG     | knockout NTR               |
| NTR-509    | nitroreductase | TcCLB.510611.60 and TcCLB.506791.70  | GCDCCTGAGATGGGGCTGGAGA/GTGGGT | 509                             | SaCas9    | GCCCGCCCGCGCTGGATGGGGCTGGAGTAGATAGTGTAAAACGACGGCCAGTGGTGGTACTACCACTCAATTTAGTGGCA          | knockout NTR               |
| CYP51-374  | CYP51          | TcCLB.506297.260 and TcCLB.510101.50 | GAGAGCTGAACTCTTGCGG/AGGAGT    | 374                             | SaCas9    | AGGATGGGGAGAGCTGAACTCTTGCGTAGATAGTGTAAAACGACGGCCAGTGGAGAGTGGACCAATTCGAGATTTGAGAAC         | knockout CYP51             |
| CYP51-137  | CYP51          | TcCLB.506297.260 and TcCLB.510101.50 | GTGCAGTTGGCAGAACCCG/TTGAGT    | 137                             | SaCas9    | GGACACATTTGGAGTTGGCAGAACCCG TAGATAGATAGTGTAAAACGACGGCCAGTCTTGAGTTATGGAGGATGCAACGCTGAT     | knockout CYP51             |
| CYP51-178  | CYP51          | TcCLB.506297.260 and TcCLB.510101.50 | GTGCATCGCTGAACTCA/CGGGGT      | 178                             | SaCas9    | ATTGTGAGTTGGCAGAACCCGTTGAGTAGATAGTGTAAAACGACGGCCAGTCTTGAGTTATGGAGGATGCAACGCTGATCTCAAG     | knockout CYP51             |
| GP72-925   | GP72           | TcCLB.509561.20                      | GCATGGGCCATTTGTTGGT/GTGAAT    | 925                             | SaCas9    | CACATGGGCCATTTGTTGGTACCCATACGAGCTCCAGACTACGCTTACCCATACGAGCTCCAGACTACGCTCTTGTGAATATAACAACA | tag GP72 with HA tag       |
| GP72-1138  | GP72           | TcCLB.509561.20                      | GAGCCCLACATCAATCCAG/CGGGGT    | 1138                            | SaCas9    | CGAGCCCLACATCAATCTACCCATACGAGCTCCAGACTACGCTTACCCATACGAGCTCCAGACTACGCTCACCGGGGTTTTGCTGTGG  | tag GP72 with HA tag       |
| GP72-1234  | GP72           | TcCLB.509561.20                      | GAAAGGATTCATGATAGCC/CCGGGT    | 1234                            | SaCas9    | CAATCGAGACCCCGGTTACCCATACGAGCTCCAGACTACGCTTACCCATACGAGCTCCAGACTACGCTATGATGAACTGCTTTCTTG   | tag GP72 with HA tag       |
| GP72-1428  | GP72           | TcCLB.509561.20                      | GCTCTCTGAGATGCCCT/TTGAGT      | 1428                            | SaCas9    | CGGAATTTTACCCAGAGTACCCATACGAGCTCCAGACTACGCTTACCCATACGAGCTCCAGACTACGCTGGCATGCTTCAGAGGAGGG  | tag GP72 with HA tag       |
| eGFP-435   | eGFP           |                                      | GTTTACTCAGCTTGTGCC/CAGGAT     | 435                             | SaCas9    | GACTTCAGGAGGAGCGCAACATCTGGGGTAGATAGATAGCACAAAGCTGAGTACAACTACACAGCCAC                      | knockout eGFP              |
| eGFP-381   | eGFP           |                                      | CTTCAAGCTGATGCGGTCAC/CAGGGT   | 381                             | SaCas9    | GAGGTGAAGTTGAGGGGCGACCCCTGGTGTAGATAGATAGACCCGATCGAGCTGAAGGGGATCGACTTC                     | knockout eGFP              |
| LPG(-16)   | LPG2           | Umpf_34_3120                         | AATCTTTCGGTGGTTCG/ACGGGT      | -16                             | SaCas9    | TTTCAACAAGGCGAATACCCGATGACAAATAGATAGATAGCCCAACCGAAAGATTGCATCGCAACTGT                      | knockout LPG2              |
| TCRT-181   | CRT            | TcCLB.509011.40 and TcCLB.510685.10  | GAGCAAGGTTCTCGTTCG/CGGGGT     | 181                             | SaCas9    | GATCGGAGAGAGCAAGGTTCTCGTCTGTAGATAGATAGTGTAAAACGACGGCCAGTACGGAGGATGCGCGGTTTTACGCTTGTCT     | knockout CRT               |

Column D: Red, PAM sequences  
Column G: Blue, 3 frame stop codons  
Purple, M13 sequence  
Green, G manually added  
Black, homology arms  
Orange, 2xHA sequence
