# Supplementary material for: Rapid, Selection-Free, High-Efficiency Genome Editing in Protozoan Parasites Using CRISPR-Cas9 Ribonucleoproteins
Source: PubMed Central journal article supplement (PMC5676044; doi:10.1128/mbio.01788-17), 2017-11-07
Supplement: mbo005173566st2.pdf [file mbo005173566st2.pdf]

| primer name             | sequence                                                                                          | use                                            |
|-------------------------|---------------------------------------------------------------------------------------------------|------------------------------------------------|
| SaCas9_pET32_F:         | GACGACGACAAGATGCCGAAGAAAAAGCGCAAGGTCGAAGCGTCCATGAAAAGG                                            | cloning SaCas9 into pET                        |
| SaCas9_pET32_R:         | GAGGAGAAGCCCGTTAGCCCTTTTGATAATCTGAGGGTGCTTTTGCTCTCAC                                              | cloning SaCas9 into pET                        |
| SaCas9_sgRNA_F          | GAGAATTGTAATACGACTCACTATAGGGAGAXXXXXXXXXXXXXXXXXXXXXGTTTAGTACTCTGTAATTTTAGGTATGAGGTAGACGAAAATTGTA | sgRNA for SaCas9                               |
| SaCas9_sgRNA_R          | AAAAAATCTCGCCAACAAGTTGACGAGAT                                                                     | sgRNA for SaCas9                               |
| SaCas9_scaff_F:         | GTTTTAGTACTCTGTAATTTAGGTATGAGGTAGACGAAAATTGACTTATACCTAAAATTACAGAACTACTAAAACAAGGCAAAATGCCGTGTTTA   | sgRNA scaffold                                 |
| SaCas9_scaff_R:         | AAAAAATCTCGCCAACAAGTTGACGAGATAAACACGGCATTTCCTGTTTGTAGTAGATTCTGTAATTTTAGGTATAAGTACAATTTTCGTCT      | sgRNA scaffold                                 |
| Forward primer (M13)    | TGTA AACGACGGCCAGT                                                                                | test for insertion of M13 from repair template |
| Tc Galf reverse primer  | GACCGTGAAGTCTTCCAA                                                                                | test for Galf mutant and WT allele             |
| TcWTGalf forward primer | TGATTCATTTGTAATGACGTTCTT                                                                          | test for Galf WT allele                        |
| TcCRT reverse primer    | GTCATCCATCGTCTCCTCGT                                                                              | test for CRT mutant and WT allele              |
| TcCRT forward primer    | AAGAGCAAAGGTCTCCGTCTGACG                                                                          | test for CRT WT allele                         |
